# Supplementary material
Source: Springer Nature journal article supplement (https://www.springermedizin.de/resource/supplementary/12891_2013_2051_MOESM3_ESM.pdf/9510172)
Supplement: MOESM3 [file 9510172]

**Number of citations identified through database searches  
after removing duplicates**  
653

**Number of citations excluded**  
592

**Number of full text articles  
assessed for eligibility**  
61

**Number of full-text articles  
excluded 42**

Not selected outcomes: 19  
RCT: 3  
Not cohort study: 3  
Not primary care: 1  
Specific treatment used: 1  
Age under 18 years old: 3  
Not exclusive to LBP: 3  
Not relevant outcomes: 9

**Number of articles fulfilled inclusion  
criteria and provided data  
for pain intensity appropriate for analysis**  
19
